# Supplementary material for: Vermittlung digitaler Kompetenzen in der Pflegeausbildung – eine Vergleichsanalyse der Rahmenpläne von Bund und Ländern
Source: Springer Nature journal article supplement (doi:10.1007/s00103-022-03575-2), 2022-08-09
Supplement: MOESM1 [file 23350124]

Onlinematerial zum Beitrag:

## **Vermittlung digitaler Kompetenzen in der Pflegeausbildung – eine Vergleichsanalyse der Rahmenpläne von Bund und Ländern**

Sebastian Hofstetter<sup>1,2</sup>, Lisa Lehmann<sup>2</sup>, Max Zilezinski<sup>1,2</sup>, Jenny-Victoria Steindorff<sup>1</sup>, Patrick Jahn<sup>1,2</sup>, Denny Paulicke<sup>1,3</sup>

**ORCID-iDs:** Sebastian Hofstetter 0000-0003-3110-2379, Max Zilezinski 0000-0001-9225-1672, Patrick Jahn 0000-0002-1533-6717

<sup>1</sup> Universitätsmedizin Halle (Saale), AG Versorgungsforschung| Pflege im Krankenhaus, Department für Innere Medizin, Medizinische Fakultät, Martin-Luther-Universität Halle-Wittenberg, Halle (Saale), Deutschland

<sup>2</sup> Medizinische Fakultät, Martin-Luther-Universität Halle-Wittenberg, Digital HealthCare Hub, Dorothea-Erxleben-Lernzentrum Halle (DELH), Halle (Saale), Deutschland

<sup>3</sup> Akkon Hochschule für Humanwissenschaften, Fachbereich Medizinpädagogik, Berlin, Deutschland

### **Korrespondenzadresse:**

Sebastian Hofstetter, M.A.  
Medizinische Fakultät, Martin-Luther-Universität Halle-Wittenberg  
AG Versorgungsforschung| Pflege im Krankenhaus  
Universitätsmedizin Halle (Saale)  
Ernst-Grube-Str. 40  
06120 Halle (Saale)  
Deutschland  
Sebastian.Hofstetter@uk-halle.de

**Tabelle Z1**

Curriculare Einbindung des Themas Robotik/ Telepräsenzroboter in die Ausbildung zur Pflegefachfrau/ zum Pflegefachmann

AD = Ausbildungsdrittel

| BL | AD | Kompetenz-zuordnung<br>PflAPrV Anlage<br>2 | Thema                                        | Adressierte Kompetenzen                                                                                                                                                                                     | Inhalte                                                                                                                                                                                                                                                                                | Umfang<br>UE | Ergänzende<br>Kommentie-<br>rung/<br>Literaturver-<br>weise                                            | Bezug Bundes-<br>rahmenlehr-<br>plan (Kernbe-<br>reich)           |
|----|----|--------------------------------------------|----------------------------------------------|-------------------------------------------------------------------------------------------------------------------------------------------------------------------------------------------------------------|----------------------------------------------------------------------------------------------------------------------------------------------------------------------------------------------------------------------------------------------------------------------------------------|--------------|--------------------------------------------------------------------------------------------------------|-------------------------------------------------------------------|
| 1  | 3  | IV 2b                                      | Einführung in digitale Technologien/ Robotik | <ul style="list-style-type: none"> <li>kennen robotische Systeme zur Rehabilitation, zur Unterstützung des Personals und zur Unterstützung der Patienten/ Bewohner in unterschiedlichen Settings</li> </ul> | <ul style="list-style-type: none"> <li>Roboter für Rehabilitation</li> <li>Roboter zur Unterstützung des Personals in Altenpflegeeinrichtungen, im Krankenhaus, in der ambulanten Pflege</li> <li>Roboter zur Unterstützung älterer und pflegebedürftiger Menschen zu Hause</li> </ul> | 4            | Klein et al., (2018) <i>Robotik in der Gesundheitswirtschaft</i> , Heidelberg, medhochzwei Verlag GmbH | Umgang mit Pflegedokumentationssystem (analog / digital) (S. 165) |
| 2  | 3  | IV 2 c                                     | Gesetzliche Grundlagen                       | <ul style="list-style-type: none"> <li>kennen gesetzliche Grundlagen zum Datenschutz, Schweigepflicht,</li> <li>E-Health-Gesetz, Fernbehandlungsgesetz</li> </ul>                                           | <ul style="list-style-type: none"> <li>Datenschutz</li> <li>Schweigepflicht</li> <li>E- Health Gesetz</li> <li>Fernbehandlungsgesetz</li> </ul>                                                                                                                                        | 2            |                                                                                                        | Steuerung und Dokumentation pflegerischen Handelns (S. 202)       |
| 3  | 4  | II 3b                                      | ethische Einordnung                          | <ul style="list-style-type: none"> <li>kennen Empfehlungen des Ethikrates</li> <li>reflektieren ethische Konfliktsituationen im Zusammenhang mit Robotik</li> </ul>                                         | <ul style="list-style-type: none"> <li>Stellungnahme Robotik für gute Pflege</li> <li>Ethische Prinzipien, Fallarbeit</li> </ul>                                                                                                                                                       | 2<br>2       | Deutscher Ethikrat, (2020) <i>Stellungnahme Robotik für gute Pflege</i> , Berlin                       | Steuerung und Dokumentation pflegerischen Handelns (S. 246)       |
| 4  | 4  | V 1b, c                                    | Telemedizin                                  | <ul style="list-style-type: none"> <li>kennen evidenzbasierte Einsatzszenarien für telemedizinische Anwendungen</li> <li>kennen und finden Einsatzszenarien in ihrer beruflichen Lebenswelt</li> </ul>      | <ul style="list-style-type: none"> <li>Telekonsil</li> <li>Patientenmonitoring im häuslichen Umfeld</li> <li>Betrachtung unterschiedlicher Lebensbereiche (Klinik, Pflegeheim, Häuslichkeit)</li> </ul>                                                                                | 4            |                                                                                                        | Software für die Planung (S. 86)                                  |

|   |   |                       |                                     |                                                                                                                                                                                                                                                                     |                                                                                                                                                                                                                                                                                                                |   |                                                                                                |                                                             |
|---|---|-----------------------|-------------------------------------|---------------------------------------------------------------------------------------------------------------------------------------------------------------------------------------------------------------------------------------------------------------------|----------------------------------------------------------------------------------------------------------------------------------------------------------------------------------------------------------------------------------------------------------------------------------------------------------------|---|------------------------------------------------------------------------------------------------|-------------------------------------------------------------|
| 5 | 5 | IV 2 b<br>II 1 a      | Telepräsenzsysteme                  | <ul style="list-style-type: none"> <li>• kennen die Funktionsweise eines Telepräsenzroboters</li> <li>• können einen TP bedienen</li> <li>• kennen und bewerten die Kommunikation über einen TP</li> <li>• leiten Schwerpunkte für das eigene Handeln ab</li> </ul> | <ul style="list-style-type: none"> <li>• Aufbau eines TP (exemplarisch)</li> <li>• Funktionsweise</li> <li>• Störungen und Lösungsmöglichkeiten</li> <li>• Praktische Auseinandersetzung mit dem TP</li> <li>• Praktische Übung</li> <li>• Reflexion, Kriterien für die Kommunikation über einen TP</li> </ul> | 4 |                                                                                                | Steuerung und Dokumentation pflegerischen Handelns (S. 114) |
|   | 5 | III 1a<br>III 3 a,b,c | Telepräsenzsystem in der Televisite | <ul style="list-style-type: none"> <li>• übernehmen Mitverantwortung Versorgung und Behandlung von Patienten, bringen ihre pflegfachliche Sichtweise in das Szenario ein,</li> <li>• bearbeiten auftretende interprofessionelle Konflikte</li> </ul>                | <ul style="list-style-type: none"> <li>• Interprofessionelles Training im Setting Televisite</li> </ul>                                                                                                                                                                                                        | 6 | Dorothea-Erxleben-Lernzentrum (Simulationspatienten; Future Care Lab, Digital Health Care Hub) | Pflegedokumentationssystem Informationen entnehmen (S. 118) |
